# Supplementary material
Source: PubMed Central journal article supplement (PMC5361526)
Supplement: SD2.pdf [file SD2.pdf]

SUPPLEMENTAL TABLE 1

Summary statistics for 10 GARP modeling experiments using randomly subset testing and training data to evaluate model variability due to changes in input data. Experiments are ranked by AUC score and omission values

| GARP experiment | AUC    | z score | SE     | Total omission | Average omission | Total commission | Average commission |
|-----------------|--------|---------|--------|----------------|------------------|------------------|--------------------|
| Random 8        | 0.9285 | 11.61   | 0.0321 | 0              | 0                | 13.80            | 21.12              |
| Random 5        | 0.9221 | 11.46   | 0.0333 | 0              | 0                | 15.06            | 21.90              |
| Random 6        | 0.9212 | 11.26   | 0.0335 | 0              | 0                | 15.77            | 22.80              |
| Random 3        | 0.9197 | 11.90   | 0.0338 | 0              | 0                | 14.92            | 19.73              |
| Random 4        | 0.9155 | 11.10   | 0.0345 | 0              | 0                | 16.20            | 23.28              |
| Random 7        | 0.9081 | 10.99   | 0.0358 | 0              | 1                | 16.36            | 22.69              |
| Random 1        | 0.9040 | 12.30   | 0.0365 | 3.2            | 2.5              | 14.47            | 18.59              |
| Random 2        | 0.9024 | 11.98   | 0.0367 | 3.2            | 5.1              | 14.01            | 18.96              |
| Random 10       | 0.9020 | 11.26   | 0.0368 | 0              | 1.6              | 17.35            | 22.63              |
| Random 9        | 0.8885 | 11.30   | 0.0388 | 3.2            | 2.8              | 17.08            | 22.88              |

AUC = area under curve; SE = standard error.
